# Supplementary material for: Efficacy of Kinematic Parameters for Assessment of Temporomandibular Joint Function and Disfunction: A Systematic Review and Meta-Analysis
Source: MDPI journal article supplement (doi:10.3390/bioengineering9070269), 2022-06-22
Supplement: s1 [file s1]

# Efficacy of Kinematic Parameters for Assessment of Temporomandibular Joint Function and Dysfunction: A Systematic Review and Meta-Analysis

Alessandra Scolaro <sup>1,2</sup>, Shah Nawaz Khijmatgar <sup>1,2</sup>, Pooja Mali Rai <sup>1,2</sup>, Francesca Falsarone <sup>2</sup>, Francesca Alicchio <sup>2</sup>, Arianna Mosca <sup>2</sup>, Christian Greco <sup>3</sup>, Massimo Del Fabbro <sup>1,4</sup> and Gianluca Martino Tartaglia <sup>1,2,\*</sup>

1 Department of Biomedical, Surgical and Dental Sciences, University of Milan, 20122 Milan, Italy; scolaro.al@gmail.com (A.S.); khijmatgar@gmail.com (S.K.); poojarai93@gmail.com (P.M.R.); massimo.delfabbro@unimi.it (M.D.F.)

2 Fondazione IRCCS Cà Granda, Ospedale Maggiore Policlinico, 20122 Milan, Italy; francescafalsarone7@gmail.com (F.F.); f.alicchio@gmail.com (F.A.); ari.mosca97@gmail.com (A.M.); gianluca.tartaglia@unimi.it (G.M.T.)

3 Head of the Unit of Dentistry, Azienda Sanitaria dell'Alto Adige, Merano Hospital, 39100 Bolzano, Italy; christian.greco@sabes.it

4 IRCC Orthopaedic Institute Galeazzi, 20161 Milan, Italy

\* Correspondence: gianluca.tartaglia@unimi.it

**Table S1.** Characteristic Table.

| Study                    | Year | Country | Sample/Sex       | Age                                 | Outcomes                          | Study design       | Sponsorship | Diagnostic tool |
|--------------------------|------|---------|------------------|-------------------------------------|-----------------------------------|--------------------|-------------|-----------------|
| Bernhard et al. [1]      | 2003 | GER     | 30<br>M:19 F:11  | 21 to 26                            | Condylar trajectories             | Case series        | NR          | Axhiography     |
| Ghodsi et al. [2]        | 2018 | IR      | 50<br>M:33 F:17  | 26                                  | Condylar trajectories             | Case series        | NR          | Axhiography     |
| Hirai et al. [3]         | 2009 | JAP     | 22<br>M:NR F:NR  | 25 to 68                            | Incisal trajectories              | Case control study | NR          | Axhiography     |
| Hue et al. [4]           | 2011 | FRA     | 60<br>M: 26 F:34 | 58 to 64                            | Condylar angle                    | Case series study  | NR          | Axhiography     |
| Sadat Koshari et al. [5] | 2003 | GER     | 30<br>M:11 F:19  | Test: 21 ± 7<br>Control: 17.9 ÷ 7.2 | Condylar trajectories             | Case control study | NR          | Axhiography     |
| Sadat Koshari et al. [6] | 2003 | GER     | 8<br>M:4 F:4     | 21.8 ± 8.0                          | Helical axis trajectories         | Case series        | NR          | Axhiography     |
| Tamaki et al. [7]        | 1997 | JAP     | 45<br>M:10 F:35  | 13 to 62                            | Condylar trajectories, hinge axis | Case series        | NR          | Axhiography     |
| Wieckiewicz et al. [8]   | 2014 | POL     | 35<br>M:0 F:35   | 10 to 35                            | Condylar path inclination         | Case series        | NR          | Axhiography     |

|                             |      |     |                       |                                                 |                                             |                    |                                                                                                                |                     |
|-----------------------------|------|-----|-----------------------|-------------------------------------------------|---------------------------------------------|--------------------|----------------------------------------------------------------------------------------------------------------|---------------------|
| Baqaien et al. [9]          | 2007 | GER | 213<br>M:103<br>F:110 | 6.5 to 12.9                                     | Condylar path inclination                   | Cohort study       | NR                                                                                                             | Ultrasonic tracking |
| Kiseri et al. [10]          | 2018 | TUR | 35<br>M:13 F:22       | 7 to 11                                         | Condylar trajectories                       | Case series        | Scientific Research Projects Coordination Unit of Istanbul University                                          | Ultrasonic tracking |
| Ko et al. [11]              | 2012 | JAP | 50<br>M:16 F:34       | Test: $25.6 \pm 3.7$<br>Control: $25.7 \pm 5.1$ | Condylar trajectories                       | Case control study | NR                                                                                                             | Ultrasonic tracking |
| Ko et al. [12]              | 2015 | JAP | 21<br>M:7 F:14        | $25.5 \pm 4.7$                                  | Condylar trajectories, incisal trajectories | Cohort study       | NR                                                                                                             | Ultrasonic tracking |
| Kordab et al. [13]          | 2014 | GER | 259<br>M:100<br>F:159 | NR                                              | Condylar path inclination                   | Case series        | NR                                                                                                             | Ultrasonic tracking |
| Linsen et al. [14]          | 2016 | GER | 36<br>M:8 F:28        | $28.03 \pm 6.58$                                | Condylar trajectories, incisal trajectories | Case series        | the Department of Prosthodontics, Preclinical Education and Dental Material Science, University Hospital Bonn. | Ultrasonic tracking |
| Linsen et al. [15]          | 2021 | GER | 39<br>M:15 F:24       | $48.9 \pm 16.2$                                 | Condylar trajectories, incisal trajectories | Cohort study       | NR                                                                                                             | Ultrasonic tracking |
| Ratzmann et al. [16]        | 2007 | GER | 23<br>M:11 F:12       | 46.7                                            | Condylar inclination angle                  | Case series        | NR                                                                                                             | Ultrasonic tracking |
| Reichender et al. [17]      | 2013 | GER | 132<br>M:68 F:64      | 7.2 to 10.6                                     | MMO CPIA                                    | Cohort study       | NR                                                                                                             | Ultrasonic tracking |
| Schwestka-Polly et al. [18] | 1999 | GER | 40<br>M:NR<br>F:NR    | NR                                              | Mandibular rotation                         | Case control study | NR                                                                                                             | Ultrasonic tracking |
| Stiesch-Scholz et al. [19]  | 2006 | GER | 60<br>M:NR<br>F:NR    | NR                                              | Condylar trajectories                       | Case control study | NR                                                                                                             | Ultrasonic tracking |
| Teng et al. [20]            | 2015 | JAP | 63<br>M:17 F:46       | NR                                              | Condylar and incisal trajectories           | Cohort study       | grant (CMRPG 381623) from Chang Gung Memorial Hospital                                                         | Ultrasonic tracking |

|                      |      |     |                 |                                         |                                                 |              |                                                                                                                   |                         |
|----------------------|------|-----|-----------------|-----------------------------------------|-------------------------------------------------|--------------|-------------------------------------------------------------------------------------------------------------------|-------------------------|
| Wang et al. [21]     | 2009 | CHI | 44<br>M:23 F:21 | Test: 23.1<br>Control:22.5              | Condylar trajectories                           | Cohort study | NR                                                                                                                | Ultrasonic tracking     |
| Yen et al. [22]      | 2017 | CHI | 20<br>M:18 F:2  | Test: 28.9 ± 2.4<br>Control: 29.4 ± 3.2 | Condylar trajectories                           | Cohort study | NR                                                                                                                | Ultrasonic tracking     |
| Baeyens et al. [23]  | 2013 | CH  | 12<br>M:5 F:7   | NR                                      | Condylar and helical axis trajectories          | Case series  | NR                                                                                                                | Magnetic Tracking       |
| Baltali et al. [24]  | 2008 | TUR | 5<br>M:0 F:5    | NR                                      | Condylar and incisal trajectories               | Case series  | NR                                                                                                                | Magnetic Tracking       |
| Keller et al. [25]   | 2012 | USA | 36<br>M:2 F:34  | 46                                      | Condylar, incisal and helical axis trajectories | Cohort study | NR                                                                                                                | Magnetic Tracking       |
| Minami et al. [26]   | 2018 | JAP | 14<br>M:6 F:8   | NR                                      | Incisal trajectories and mandibular rotation    | Case series  | Grant-in-Aid for Scientific Research from the Japan Society for the Promotion of Science                          | Magnetic Tracking       |
| Yamamoto et al. [27] | 2009 | JAP | 25<br>M:15 F:5  | 29.3 ± 12.3                             | Intraarticular distance                         | Case series  | NR                                                                                                                | Magnetic Tracking       |
| Chang et al. [28]    | 2015 | JAP | 26<br>M:10 F:16 | 19 to 25                                | Intraarticular distance                         | Cohort study | grant (HI13C1491) from the Korea Health Technology R&D Project, Ministry of Health and Welfare, Republic of Korea | Optoelectronic tracking |
| Ettlin et al. [29]   | 2008 | CH  | 10<br>M:5 F:5   | 18 to 31                                | Intraarticular distance, condilar trajectories  | Case series  | standard financial plan of the University of Zürich and by Grant of the Swiss National Science Foundation         | Optoelectronic tracking |
| Fushima et al. [30]  | 2003 | JAP | 10<br>M:3 F:7   | NR                                      | Intraarticular distance                         | Case series  | The standard financial                                                                                            | Optoelectronic tracking |

|                        |      |         |                 |                            |                                                      |              |                                                                                                               |                         |
|------------------------|------|---------|-----------------|----------------------------|------------------------------------------------------|--------------|---------------------------------------------------------------------------------------------------------------|-------------------------|
|                        |      |         |                 |                            |                                                      |              | plan of the University of Zurich.                                                                             |                         |
| Gallo et al. [31]      | 2008 | CH      | 11<br>M:4 F:7   | 28 to 38                   | Intraarticular distance, condylar trajectories       | Case series  | standard financial plan of the University of Zürich and by Grant of the Swiss National Science Foundation     | Optoelectronic tracking |
| Goto et al. [32]       | 2001 | NED     | 4<br>M:4 F:0    | 30 to 35                   | Muscular length                                      | Case series  | MRC (Canada)*                                                                                                 | Optoelectronic tracking |
| Hayasaka et al. [33]   | 2008 | JAP     | 20<br>M:0 F:20  | 19 to 27                   | Mandibular rotation                                  | Case series  | Japanese society for the promotion of science                                                                 | Optoelectronic tracking |
| Kim et al. [34]        | 2013 | KOR sud | 15<br>M:4 F:11  | F: 21.4<br>M: 26.3         | Condylar trajectories                                | Case series  | Industrial Strategic Technology Development Program and the research Grant from the Seoul National University | Optoelectronic tracking |
| Kim et al. [35]        | 2010 | KOR sud | 16<br>M:6 F:8   | 17 to 27                   | Condylar trajectories                                | Case series  | NR                                                                                                            | Optoelectronic tracking |
| Kubota et al. [36]     | 2010 | JAP     | 48<br>M:11 F:37 | Test: 5.9<br>Control: 25.9 | Condylar trajectories and cycle mastication data     | Cohort study | Kakenhi from Japan society for the promotion of science                                                       | Optoelectronic tracking |
| Leader et al. [37]     | 2003 | USA     | 6<br>M:3 F:3    | 20 to 47                   | Condylar trajectories                                | Case series  | NIDCR grant from the National Institutes of Health, Bethesda, USA                                             | Optoelectronic tracking |
| Wojczynska et al. [38] | 2019 | CH      | 5<br>M:1 F:4    | 22 to 61                   | Condylar trajectories                                | Case series  | grant from the AO Foundation, Du'bendorf, Switzerland                                                         | Optoelectronic tracking |
| Yashiro et al. [39]    | 2015 | JAP     | 20<br>M:0 F:20  | 18 to 36                   | Condylar trajectories and intraarticular joint space | Case series  | Grant-in-Aid for Scientific Research from the Japanese Ministry of Education, Science and Culture.            | Optoelectronic tracking |
| Yashiro et al. [40]    | 2015 | JAP     | 10<br>M:0 F:10  | 24 to 33                   | Condylar trajectories                                | Case series  | Grant-in-Aid for Scientific Research                                                                          | Optoelectronic tracking |

|                            |      |     |                 |                                     |                                                      |                    |                                                                                                 |                         |
|----------------------------|------|-----|-----------------|-------------------------------------|------------------------------------------------------|--------------------|-------------------------------------------------------------------------------------------------|-------------------------|
|                            |      |     |                 |                                     | s and intraarticular joint space                     |                    | from the Japanese Ministry of Education, Science and Culture.                                   |                         |
| Zaugg et al. [41]          | 2012 | CH  | 6<br>M:4 F:2    | 54 to 71                            | Condylar trajectories and intraarticular joint space | Case series        | standard financial plan of the University of Zurich                                             | Optoelectronic tracking |
| Abbink et al. [42]         | 1999 | NED | 8<br>M:4 F:4    | 20 to 50                            | Mandibular translation                               | Case series        | Faculty of Medicine of the Utrecht University and the Netherlands Institute for Dental Sciences | 3D scanning             |
| Amhamed et al. [43]        | 2016 | AUS | 14<br>M:9 F:5   | 33.8 ± 3.8                          | Mandibular translation                               | Case series        | NR                                                                                              | 3D scanning             |
| Bhaskaracharya et al. [44] | 2015 | AUS | 31<br>M:8 F:23  | Test: 49 to 76<br>Control: 50 to 78 | Incisal trajectories                                 | Case control study | Australian Dental Research Foundation                                                           | 3D scanning             |
| Buschang et al. [45]       | 2001 | USA | 27<br>M:0 F:27  | 23 to 35                            | Condylar and incisal trajectories                    | Case series        | Center for Craniofacial Research and Diagnosis, Baylor College of Dentistry,                    | 3D scanning             |
| Buschang et al. [46]       | 2000 | USA | 26<br>M:15 F:11 | 20 to 35                            | mastication cycle data                               | Cohort study       | NR                                                                                              | 3D scanning             |
| Calixtre et al. [47]       | 2017 | BRA | 36<br>M:19 F:17 | 23.92 ± 2.8                         | Condylar trajectories                                | Case series        | São Paulo Research Foundation                                                                   | 3D scanning             |
| Catic, Naeije [48]         | 1999 | CRO | 40<br>M:13 F:27 | Test: 16 to 61<br>Control: 21 to 33 | Hinge axis                                           | Case control study | NR                                                                                              | 3D scanning             |
| Coutant et al. [49]        | 2008 | FRA | 32              | NR                                  | Condylar trajectories                                | Case series        | CNRS UMR 5227 Laboratoire Mouvement Adaptation Cognition'' (CHIEDI)                             | 3D scanning             |
| Crane et al. [50]          | 2013 | USA | 22<br>M:2 F:20  | 10 to 58                            | Mandibular translation                               | Case series        | Grants awarded to GEG from the National Institutes of Health.                                   | 3D scanning             |

| Incisal and velocity                                      |      |     |                  |                                          |                    |                                                                                       |             |  |
|-----------------------------------------------------------|------|-----|------------------|------------------------------------------|--------------------|---------------------------------------------------------------------------------------|-------------|--|
| Condylar and incisal trajectories, cycle mastication data |      |     |                  |                                          |                    |                                                                                       |             |  |
| De felicio et al. [51]                                    | 2013 | ITA | 20<br>M:8 F:12   | Test: 27.3 ± 7.8<br>Control: 31.9 ± 16.3 | Case control study | Fundação de Amparo a Pesquisa do Estado de São Paulo, Brazil                          | 3D scanning |  |
| Ferrario et al. [52]                                      | 2005 | ITA | 27:<br>M:12 F:15 | 19 to 30                                 | Case series        | NR                                                                                    | 3D scanning |  |
| Gallo et al. [53]                                         | 1997 | CH  | 30<br>M:17 F:13  | 10 to 34                                 | Case series        | standard financial plan of the University of Zurich                                   | 3D scanning |  |
| Gallo et al. [54]                                         | 2000 | CH  | 7<br>M:2 F:5     | 22 to 38                                 | Case series        | standard financial plan of the University of Zurich                                   | 3D scanning |  |
| Gallo et al. [55]                                         | 2006 | CH  | 50<br>M:12 F:38  | Test: 26 to 51<br>Control: 25 to 39      | Case control study | standard financial plan of the University of Zurich                                   | 3D scanning |  |
| Gerstner et al. [56]                                      | 2005 | USA | 46<br>M:13 F:33  | 19 to 62                                 | Case series        | USPHS Research Grant from the National Institute of Dental Research.                  | 3D scanning |  |
| Hayashi et al. [57]                                       | 2009 | JAP | 10<br>M:5 F:5    | NR                                       | Case series        | NR                                                                                    | 3D scanning |  |
| Hayashi et al. [58]                                       | 2012 | JAP | 10<br>M:7 F:3    | 25±7.0                                   | Case series        | Grant-in-Aid for Young Scientists from the Japan Society for the Promotion of Science | 3D scanning |  |
| Leader et al. [59]                                        | 1997 | USA | 20<br>M:3 F:17   | 31.2 ± 11.2                              | Case series        | NIH grant                                                                             | 3D scanning |  |
| Lemoine et al. [60]                                       | 2005 | USA | 10<br>M:5 F:5    | 21 to 47                                 | Case series        | NR                                                                                    | 3D scanning |  |
| Lewis et al. [61]                                         | 2001 | USA | 56<br>M:29 F:27  | Test: 23 to 39<br>Control: 23 to 35      | Case control study | NR                                                                                    | 3D scanning |  |

|                         |      |     |                 |                                           |                                                                         |                          |                                                                                                                                                                                                                         |             |
|-------------------------|------|-----|-----------------|-------------------------------------------|-------------------------------------------------------------------------|--------------------------|-------------------------------------------------------------------------------------------------------------------------------------------------------------------------------------------------------------------------|-------------|
|                         |      |     |                 |                                           | trajectorie<br>s                                                        |                          |                                                                                                                                                                                                                         |             |
| Lobezoo et al.<br>[62]  | 2000 | NED | 5<br>M:5 F:0    | 20 to 25                                  | Condylar<br>traslation<br>and<br>rotation                               | Case series              | Netherlands<br>Institute for<br>Dental Sciences<br>(IOT)                                                                                                                                                                | 3D scanning |
| Mapelli et al.<br>[63]  | 2009 | ITA | 26<br>M:12 F:14 | 19 to 30                                  | Condylar<br>trajectorie<br>s                                            | Cohort<br>study          | NR                                                                                                                                                                                                                      | 3D scanning |
| Mapelli et al.<br>[64]  | 2016 | ITA | 40<br>M:5 F:35  | Test: 18 to<br>34<br>Control: 20<br>to 31 | Condylar<br>and<br>incisal<br>trajectorie<br>s                          | Case<br>control<br>study | Provost's Office for<br>Research of the<br>University of Sao<br>Paulo, Brazil, and<br>Nacional Council<br>for Scientific and<br>Technological<br>Development                                                            | 3D scanning |
| Naeije [65]             | 2002 | NED | 35<br>M:17 F:18 | 18 to 31                                  | Condylar<br>translatio<br>n and<br>rotation                             | Case series              | NR                                                                                                                                                                                                                      | 3D scanning |
| Naeije e<br>Hofman [66] | 2003 | NED | 10<br>M:5 F:5   | 21 to 33                                  | Condylar<br>trajectorie<br>s                                            | Case series              | Netherlands<br>Institute of Dental<br>Sciences (IOT)                                                                                                                                                                    | 3D scanning |
| Ostry et al.<br>[67]    | 1997 | CAN | 5<br>M:5 F:0    | NR                                        | Kinemati<br>c hinge<br>axis                                             | Case series              | NIH grant from the<br>National Institute<br>on Deafness and<br>Other<br>Communication<br>Disorders, USA;<br>ATR Human<br>Information<br>Processing<br>Research<br>Laboratories, Japan,<br>NSERC-Canada,<br>FCAR, Quebec | 3D scanning |
| Ogawa et al.<br>[68]    | 1998 | JAP | 41<br>M:16 F:25 | 19 to 28                                  | Incisal<br>trajectorie<br>s                                             | Case series              | NR                                                                                                                                                                                                                      | 3D scanning |
| Remijn et al.<br>[69]   | 2017 | NED | 22<br>M:9 F:13  | Test: 17 to<br>31<br>Control: 28<br>to 32 | Mandibul<br>ar<br>trajectorie<br>s and<br>masticati<br>on cycle<br>data | Case<br>control<br>study | NR                                                                                                                                                                                                                      | 3D scanning |
| Sforza et al.<br>[70]   | 2009 | ITA | 9<br>M:8 F:1    | 18 to 58                                  | Condylar<br>translatio                                                  | Cohort<br>study          | Annual grant from<br>Milan University                                                                                                                                                                                   | 3D scanning |

| Table 1. Summary of the studies included in the meta-analysis. |      |         |                   |                                     |                                     |                    |                                                                                                                                                |             |
|----------------------------------------------------------------|------|---------|-------------------|-------------------------------------|-------------------------------------|--------------------|------------------------------------------------------------------------------------------------------------------------------------------------|-------------|
| Author(s)                                                      | Year | Country | Sample Size (M:F) | Age (yr)                            | Study Design                        | Outcome Measures   | Follow-up (yr)                                                                                                                                 | 3D Scanning |
| Sforza et al. [71]                                             | 2010 | ITA     | 58<br>M:28 F:30   | 24                                  | Kinematic hinge axis                | Case control study | NR                                                                                                                                             | 3D scanning |
| Sforza et al. [72]                                             | 2011 | ITA     | 46<br>M:23 F:23   | 18 to 50                            | Incisal trajectories                | Case control study | NR                                                                                                                                             | 3D scanning |
| Shiller et al. [73]                                            | 1999 | CAN     | 7<br>M:2 F:5      | NR                                  | Mandibular translation and rotation | Case series        | NR                                                                                                                                             | 3D scanning |
| Shiller et al. [74]                                            | 2000 | FRA     | 8                 | NR                                  | Mandibular rotation                 | Case series        | NR                                                                                                                                             | 3D scanning |
| Siegler et al. [75]                                            | 1991 | USA     | 3                 | NR                                  | Condylar trajectories               | Case series        | NR                                                                                                                                             | 3D scanning |
| Slater et al. [76]                                             | 1999 | NED     | 10<br>M:4 F:6     | 20 to 32                            | Condylar trajectories               | Case series        | Netherlands Institute of Dental Sciences (IOT).                                                                                                | 3D scanning |
| Tomonari et al. [77]                                           | 2017 | JAP     | 32<br>M:22 F:10   | 19 to 25                            | Condylar trajectories               | Case series        | JSPS KAKENHI                                                                                                                                   | 3D scanning |
| Travers et al. [78]                                            | 2000 | JAP     | 27<br>M:0 F:27    | 23 to 35                            | Condylar and incisal trajectories   | Case series        | Center for Craniofacial Research and Diagnosis, Baylor College of Dentistry, a Member of the Texas A&M University System Health Science Center | 3D scanning |
| Ugolini et al. [79]                                            | 2017 | ITA     | 18<br>M:6 F:12    | Test: 24 to 48<br>Control: 21 to 45 | Condylar and incisal trajectories   | Case control study | NR                                                                                                                                             | 3D scanning |
| Ugolini et al. [80]                                            | 2018 | ITA     | 31<br>M:12 F:19   | Test: 22 to 48<br>Control: 19 to 29 | Mandibular translation and rotation | Case control study | NR                                                                                                                                             | 3D scanning |
| Visscher et al. [81]                                           | 2000 | NED     | 10<br>M:4 F:6     | 20 to 32                            | Condylar trajectories               | Case series        | NR                                                                                                                                             | 3D scanning |



|                      |      |       |                   |                                                 |                                                 |                    |                                                                                                                                                                                                                      |                           |
|----------------------|------|-------|-------------------|-------------------------------------------------|-------------------------------------------------|--------------------|----------------------------------------------------------------------------------------------------------------------------------------------------------------------------------------------------------------------|---------------------------|
| Zhao et al. [82]     | 2012 | AUS   | 26<br>M:12 F:14   | Test: $29.5 \pm 4.9$<br>Control: $29.6 \pm 3.4$ | Incisal trajectoryes and mastication cycle data | Case control study | Postgraduate Scholarship in Neuroscience of the University of Sidney and the National Health and Medical Research Council of Australia                                                                               | 3D scanning               |
| Dos Santos [83]      | 2019 | BRA   | 12<br>M:6 F:6     | $22.2 \pm 4.7$                                  | Condylar trajectoryes                           | Case series        | NR                                                                                                                                                                                                                   | Ultrasonic tracking       |
| Dos Santos [84]      | 2021 | BRA   | 184<br>M:44 F:140 | 18 to 45                                        | Condylar trajectoryes                           | Cross sectional    | Department of Postgraduate Program in Rehabilitation Sciences, Universidade Nove de Julho—UNINOVE.                                                                                                                   | Mechanical linkage system |
| Ernst et al. [85]    | 2019 | GER   | 13<br>M:0 F:13    | 21 to 31                                        | Mandibular rotation                             | Case series        | Deutsche Forschungsgemeinschaft                                                                                                                                                                                      | Ultrasonic tracking       |
| Chen et al. [86]     | 2020 | TW    | 10<br>M:5 F:5     | $32.3 \pm 8.5$                                  | Mandibular rotation                             | Cross sectional    | NR                                                                                                                                                                                                                   | 3d fluoroscopy            |
| Leissner et al. [87] | 2021 | CHI   | 476<br>M:92 F:384 | $31.03 \pm 15.8$                                | Condylar trajectoryes                           | Case series        | NR                                                                                                                                                                                                                   | Mechanical linkage system |
| Choi et al. [88]     | 2020 | USA   | 23                | 12.8 to 16.7                                    | Incisal trajectoryes                            | Cohort study       | NR                                                                                                                                                                                                                   |                           |
| Feng et al. [89]     | 2021 | CHINA | 6<br>M:4 F:3      | $21.7 \pm 1.25$                                 | Condylar trajectoryes                           | Case series        | National Natural Science Foundation of China, Strategic cooperation project between Sichuan University and Yibin municipal people's government and Fundamental Research Funds for the Central Universities of China. | Optoelectronic tracking   |
| Shu et al. [90]      | 2020 | CHINA | 5<br>M:3 F:2      | $20.6 \pm 2.4$                                  | Condylar trajectoryes                           | Case series        | NR                                                                                                                                                                                                                   | Video motion analysis     |

|                 |      |       |                |            |                          |             |                                                                                                                                                                                                                                                                                                                                                                                                                            |                            |
|-----------------|------|-------|----------------|------------|--------------------------|-------------|----------------------------------------------------------------------------------------------------------------------------------------------------------------------------------------------------------------------------------------------------------------------------------------------------------------------------------------------------------------------------------------------------------------------------|----------------------------|
| Shu et al. [91] | 2021 | CHINA | 13<br>M:10 F:3 | 21.8 ± 2.1 | Condylar<br>trajectories | Case series | National Natural<br>Science<br>Foundation of<br>China, Strategic<br>cooperation project<br>between<br>Sichuan University<br>and Yibin<br>municipal people's<br>government, the<br>Innovative Spark<br>Project of Sichuan<br>University, the<br>Technology<br>Innovation Project<br>of Science and<br>Technology Bureau<br>of Chengdu, and<br>Fundamental<br>Research Funds for<br>the Central<br>Universities of<br>China. | Optoelectronic<br>tracking |
|-----------------|------|-------|----------------|------------|--------------------------|-------------|----------------------------------------------------------------------------------------------------------------------------------------------------------------------------------------------------------------------------------------------------------------------------------------------------------------------------------------------------------------------------------------------------------------------------|----------------------------|

## References

- Bernhardt, O.; Küppers, N.; Rosin, M.; Meyer, G. Comparative tests of arbitrary and kinematic transverse horizontal axis recordings of mandibular movements, *J. Prosthet. Dent.* **2003**, *89*, 175–179, doi: 10.1067/mpr.2003.10.
- Ghods, S.; Rasaeipour, S. Revising average condylar inclinations using electronic pantograph assessment: a cross-sectional study. *Dent. Hypotheses.* **2018**, *9*, 84–89.
- Hirai, S.; Ogawa, T.; Shigeta, Y.; Ando, E.; Hirabayashi, R.; Ikawa, T.; Kasama, S.; Fukushima, S.; Matsuka, Y. Characteristics of mandibular movements in patients with square mandible. *Oral Surg., Oral Med. Oral Pathol. Oral Radiol. Endodontol.* **2009**, *108*, e75–e81.
- Hue, O. Condylar paths during protrusion in edentulous patients: analysis with electronic axiography. *J. Prosthodont.* **2011**, *20*, 294–298.
- Sadat-Khonsari, R.; Fenske, C.; Kahl-Nieke, B.; Kirsch, I.; Jüde, H.D. Mandibular instantaneous centers of rotation in patients with and without temporomandibular dysfunction. *J. Orofac. Orthop.* **2003**, *64*, 256–264.
- Sadat-Khonsari, R.; Fenske, C.; Kahl-Nieke, B.; Kirsch, I.; Jüde, H.D. The helical axis of the mandible during the opening and closing movement of the mouth. *J. Orofac. Orthop.* **2003**, *64*, 178–185.
- Tamaki, K.; Celar, A.G.; Beyrer, S.; Aoki, H. Reproduction of excursive tooth contact in an articulator with computerized axiography data. *J. Prosthet. Dent.* **1997**, *78*, 373–378.
- Wieckiewicz, M.; Zietek, M.; Nowakowska, D.; Wieckiewicz, W. Comparison of selected kinematic facebows applied to mandibular tracing. *Biomed. Res. Int.* **2014**, *2014*, 818694.
- Baqaien, M.A.; Al-Salti, F.M.; Muessig, D. Changes in condylar path inclination during maximum protrusion between the ages of 6 and 12 years. *J. Oral Rehabil.* **2007**, *34*, 27–33.
- Kiseri, B.; Dayan, Ç.; Yildiz, M.; Sülün, T. The correlation between direction and amount of retrusive movement and condyle position and joint space. *Cranio.* **2018**, *36*, 250–256.
- Ko, E.W.-C.; Huang, C.S.; Lo, L.-J.; Chen, Y.-R. Longitudinal observation of mandibular motion pattern in patients with skeletal class III malocclusion subsequent to orthognathic surgery. *J. Oral Maxillofac. Surg.* **2012**, *70*, e158–e168.
- Ko, E.W.-C.; Alazizi, A.I.; Lin, C.-H. Three-dimensional surgical changes of mandibular proximal segments affect outcome of jaw motion analysis. *J. Oral Maxillofac. Surg.* **2015**, *73*, 971–984.
- Kordaß, B.; Bernhardt, O.; Ratzmann, A.; Hugger, S.; Hugger, A. Standard and limit values of mandibular condylar and incisal movement capacity. *Int. J. Comput. Dent.* **2014**, *17*, 9–20.

14. Linsen, S.S.; Wolf, M.; Mussig, D. Long-term outcomes of mandibular kinematics following class II malocclusion therapy with removable functional appliance therapy. *Cranio*. **2016**, *34*, 363–370.
15. Linsen, S.S.; Schön, A.; Mercuri, L.G.; Teschke, M.; Share. Unilateral, Alloplastic Temporomandibular Joint Reconstruction, Biomechanically What Happens to the Contralateral Temporomandibular Joint?—A Prospective Cohort Study. *J Oral Maxillofac Surg*. **2021**, *10*, 2016–2029.
16. Ratzmann, A.; Mundt, T.; Schwahn, C.; Langforth, G.; Hützen, D.; Gedrange, T.; Kordaß, B. Comparative clinical investigation of horizontal condylar inclination using the JMA electronic recording system and a protrusive wax record for setting articulators. *Int. J. Comput. Dent*. **2007**, *10*, 265–284.
17. Reicheneder, C.; Kardari, Z.; Proff, P.; Fanghaenel, J.; Faltermeier, A.; Römer, P. Correlation of condylar kinematics in children with gender, facial type and weight. *Ann. Anat.* **2013**, *195*, 243–247.
18. Schwestka-Polly, R.; Kubein-Meesenburg, D.; Nagerl, H.; Fanghanel, J.; Miehe, B. Alteration of the functional condition of the mandible during clinical treatment. *Ann. Anat.* **1999**, *181*, 45–50.
19. Stiesch-Scholz, M.; Demling, A.; Rossbach, A. Reproducibility of jaw movements in patients with craniomandibular disorders. *J. Oral Rehabil.* **2006**, *33*, 807–812.
20. Teng, T.T.-Y.; Ko, E.W.-C.; Huang, C.S.; Chen, Y.-R. The Effect of early physiotherapy on the recovery of mandibular function after orthognathic surgery for Class III correction: Part I - Jaw-motion analysis. *J. Cranio-Maxillofacial Surg*. **2015**, *43*, 131–137.
21. Wang, D.; Fu, H.; Zeng, R.; Yang, X. Changes of mandibular movement tracings after the correction of mandibular protrusion by bilateral sagittal split ramus osteotomy. *J. Oral Maxillofac. Surg*. **2009**, *67*, 2238–2244.
22. Yen, C.-I.; Chou, P.-Y.; Chen, C.-H.; Chen, T.-Y.; Chen, C.-T.; Lin, W.-Y.; Lee, M.-Y. Kinematic, Kinetic and surface electromyography analysis following zygomatic fracture reconstruction. *J. Med. Biol. Eng*. **2017**, *37*, 468–473.
23. Baeyens, J.P.; Gilomen, H.; Erdmann, B.; Clijsen, R.; Cabri, J.; Vissers, D. In vivo measurement of the 3D kinematics of the temporomandibular joint using miniaturized electromagnetic trackers: technical report. *Med. Biol. Eng. Comput.* **2013**, *51*, 479–484.
24. Baltali, E.; Zhao, K.D.; Koff, M.F.; Durmus, E.; An, K.-N.; Keller, E.E. A method for quantifying condylar motion in patients with osteoarthritis using an electromagnetic tracking device and computed tomography imaging. *J. OralMaxillofac. Surg*. **2008**, *66*, 848–857.
25. Keller, E.E.; Baltali, E.; Liang, X.; Zhao, K.; Huebner, M.; An, K.-N. Temporomandibular custom hemijoint replacement prosthesis: prospective clinical and kinematic study. *J. Oral Maxillofac. Surg*. **2012**, *70*, 276–288.
26. Minami, I.; Wirianski, A.; Harakawa, R.; Wakabayashi, N.; Murray, G.M. The three-axial gyroscope sensor detects the turning point between opening and closing phases of chewing. *Clin. Exp. Dent. Res*. **2018**, *4*, 249–254.
27. Yamamoto, T.; Nishigawa, K.; Bando, E.; Hosoki, M. Effect of different head positions on the jaw closing point during tapping movements. *J. Oral Rehabil.* **2009**, *36*, 32–38.
28. Chang, A.R.; Han, J.J.; Kim, D.-S.; Yi, W.-J.; Hwang, S.J. Evaluation of intraarticular distance narrowing during temporomandibular joint movement in patients with facial asymmetry using 3-dimensional computed tomography image and tracking camera system. *J. Cranio-Maxillofacial Surg*. **2015**, *43*, 342–348.
29. Ettlin, D.A.; Mang, H.; Colombo, V.; Palla, S.; Gallo, L.M. Stereometric assessment of TMJ space variation by occlusal splints. *J. Dent. Res*. **2008**, *87*, 877–881.
30. Fushima, K.; Gallo, L.M.; Krebs, M.; Palla, S. Analysis of the TMJ intraarticular space variation: a non-invasive insight during mastication. *Med. Eng. Phys.* **2003**, *25*, 181–190.
31. Gallo, L.M.; Gössi, D.B.; Colombo, V.; Palla, S. Relationship between kinematic center and TMJ anatomy and function. *J. Dent. Res*. **2008**, *87*, 726–730.
32. Goto, T.K.; Langenbach, G.E.J.; Hannam, A.G. Length changes in the human masseter muscle after jaw movement. *Anat. Rec.* **2001**, *262*, 293–300.
33. Hayasaki, H.; Saitoh, I.; Iwase, Y.; Inada, E.; Hasegawa, H.; Tokutomi, J.; Matsumoto, Y.; Yamasaki, Y. Movement of the instantaneous center of rotation and the position of the lateral excursion center during lateral excursion. *Cranio - J. Craniomandib. Pract.* **2008**, *26*, 253–262.
34. Kim, D.-S.; Choi, S.-C.; Lee, S.-S.; Heo, M.-S.; Huh, K.-H.; Hwang, S.-J.; Kim, S.-H.; Yi, W.-J. Principal direction of inertia for 3D trajectories from patientspecific TMJ movement. *Comput. Biol. Med.* **2013**, *43*, 169–175.
35. Kim, S.-G.; Kim, D.-S.; Choi, S.-C.; Lee, S.-S.; Heo, M.-S.; Huh, K.-H.; Hwang, S.-J.; Yi, W.-J. The relationship between three-dimensional principal rotations and mandibular deviation. *Oral Surg., Oral Med. Oral Pathol. Oral Radiol. Endodontol.* **2010**, *110*, 52–60.
36. Kubota, N.; Hayasaki, H.; Saitoh, I.; Iwase, Y.; Maruyama, T.; Inada, E.; Hasegawa, H.; Yamada, C.; Takemoto, Y.; Matsumoto, Y.; Yamasaki, Y. Jaw motion during gum-chewing in children with primary dentition. *Cranio-J. Craniomandib. Pract.* **2010**, *28*, 19–29.
37. Leader, J.K.; Boston, J.R.; Rudy, T.E.; Greco, C.M.; Zaki, H.S. Relation of jaw sounds and kinematics visualized and quantified using 3-D computer animation. *Med. Eng. Phys.* **2003**, *25*, 191–200.

38. Wojczynska, A.; Gallo, L.M.; Bredell, M.; Leiggener, C.S. Alterations of mandibular movement patterns after total joint replacement: a case series of long-term outcomes in patients with total alloplastic temporomandibular joint reconstructions. *Int. J. Oral Maxillofac. Surg.* **2019**, *48*, 225–232.
39. Yashiro, K.; Iwata, A.; Takada, K.; Murakami, S.; Uchiyama, Y.; Furukawa, S. Temporomandibular joint articulations on working side during chewing in adult females with cross-bite and mandibular asymmetry. *J. Oral Rehabil.* **2015**, *42*, 163–172.
40. Yashiro, K.; Yamamoto, K.; Takada, K.; Murakami, S.; Uchiyama, Y.; Furukawa, S. Influence of balancing-side occlusal interference on smoothness of working-side condylar movement and intra-articular space in chewing efforts. *J. Oral Rehabil.* **2015**, *42*, 10–17.
41. Zaugg, B.; Hämmerle, C.H.F.; Palla, S.; Gallo, L.M. Implant-supported mandibular splinting affects temporomandibular joint biomechanics. *Clin. Oral Implants Res.* **2012**, *23*, 897–901.
42. Abbink, J.H.; Van Der Bilt, A.; Bosman, F.; Van Der Glas, H.W. Speed-dependent control of cyclic open-close movements of the human jaw with an external force counteracting closing. *J. Dent. Res.* **1999**, *78*, 878–886.
43. Amhamed, M.; Whittle, T.; Maulina, T.; Gal, J.; Akhter, R.; Murray, G.M. Effect of experimental anterior temporalis muscle pain on jaw movements. *J. Oral Rehabil.* **2016**, *43*, 889–899.
44. Bhaskaracharya, M.; Memon, S.M.; Whittle, T.; Murray, G.M. Jaw movements in patients with a history of pain: an exploratory study. *J. Oral Rehabil.* **2015**, *42*, 18–26.
45. Buschang, P.H.; Throckmorton, G.S.; Travers, K.H.; Hayasaki, H. Incisor and mandibular condylar movements of young adult females during maximum protrusion and laterotrusion of the jaw. *Arch. Oral Biol.* **2001**, *46*, 39–48.
46. Buschang, P.H.; Hayasaki, H.; Throckmorton, G.S. Quantification of human chewing-cycle kinematics. *Arch. Oral Biol.* **2000**, *45*, 461–474.
47. Calixtre, L.B.; Nakagawa, T.H.; Albuquerque-Sendin, F.; da Silva Gruninger, B.L.; de Sena Rosa, L.R.; Oliveira, A.B. Inter- and intra-rater reliability of 3D kinematics during maximum mouth opening of asymptomatic subjects. *J. Biomech.* **2017**, *64*, 245–252.
48. C'atic, A.; Naeije, M. Location of the hinge axis and the kinematic centre in asymptomatic and clicking temporo-mandibular joints. *J. Oral Rehabil.* **1999**, *26*, 661–665.
49. Coutant, J.-C.; Mesnard, M.; Morlier, J.; Ballu, A.; Cid, M. Discrimination of objective kinematic characters in temporomandibular joint displacements. *Arch. Oral Biol.* **2008**, *53*, 453–461.
50. Crane, E.A.; Rothman, E.D.; Childers, D.; Gerstner, G.E. Analysis of temporal variation in human masticatory cycles during gum chewing. *Arch. Oral Biol.* **2013**, *58*, 1464–1474.
51. De Felicio, C.M.; Mapelli, A.; Sidequersky, F.V.; Tartaglia, G.M.; Sforza, C. Mandibular kinematics and masticatory muscles EMG in patients with short lasting TMD of mild-moderate severity. *J. Electromyogr. Kinesiol.* **2013**, *23*, 627–633.
52. Ferrario, V.F.; Sforza, C.; Lovecchio, N.; Mian, F. Quantification of translational and gliding components in human temporomandibular joint during mouth opening. *Arch. Oral Biol.* **2005**, *50*, 507–515.
53. Gallo, L.M.; Airoidi, G.B.; Airoidi, R.L.; Palla, S. Description of mandibular finite helical axis pathways in asymptomatic subjects. *J. Dent. Res.* **1997**, *76*, 704–713.
54. Gallo, L.M.; Fushima, K.; Palla, S. Mandibular helical axis pathways during mastication. *J. Dent. Res.* **2000**, *79*, 1566–1572.
55. Gallo, L.M.; Brasi, M.; Ernst, B.; Palla, S. Relevance of mandibular helical axis analysis in functional and dysfunctional TMJs. *J. Biomech.* **2006**, *39*, 1716–1725.
56. Gerstner, G.E.; Lafia, C.; Lin, D. Predicting masticatory jaw movements from chin movements using multivariate linear methods. *J. Biomech.* **2005**, *38*, 1991–1999.
57. Hayashi, K.; Reich, B.; Delong, R.; Lee, S.-P.; Mizoguchi, I. A novel statistical model for mandibular helical axis analysis. *J. Oral Rehabil.* **2009**, *36*, 102–109.
58. Hayashi, K.; Hayashi, M.; Reich, B.; Lee, S.-P.; Sachdeva, A.U.C.; Mizoguchi, I. Functional data analysis of mandibular movement using third-degree b-spline basis functions and self-modeling regression. *Orthod. Waves.* **2012**, *71*, 17–25.
59. Leader, J.K.; Boston, J.R.; Rudy, T.E.; Greco, C.M.; Zaki, H.S. Use of sound and jaw movement patterns to characterize patients with temporomandibular disorders. *Annu. Int. Conf. IEEE Eng. Med. Biol. - Proc.* **1997**, *4*, 1729–1732.
60. Lemoine, J.J.; Xia, J.J.; Gateno, J.; Liebschner, M.A.K. Radiographic analysis for jaw motion normalization. *J. Oral Maxillofac. Surg.* **2005**, *63*, 961–967.
61. Lewis, R.P.; Buschang, P.H.; Throckmorton, G.S. Sex differences in mandibular movements during opening and closing. *Am. J. Orthod. Dentofac. Orthop.* **2001**, *120*, 294–303.
62. Lobbezoo, F.; Zijnenburg, A.J.; Naeije, M. Functional subdivision of the human masseter and temporalis muscles as shown by the condylar movement response to electrical muscle stimulation. *J. Oral Rehabil.* **2000**, *27*, 887–892.
63. Mapelli, A.; Galante, D.; Lovecchio, N.; Sforza, C.; Ferrario, V.F. Translation and rotation movements of the mandible during mouth opening and closing. *Clin. Anat.* **2009**, *22*, 311–318.
64. Mapelli, A.; Machado, B.C.Z.; Garcia, D.M.; Rodrigues Da Silva, M.A.M.; Sforza, C.; DeFelicio, C.M. Three-dimensional analysis of jaw kinematic alterations in patients with chronic TMD—Disc displacement with reduction. *J. Oral Rehabil.* **2016**, *43*, 824–832.
65. Naeije, M. Local kinematic and anthropometric factors related to the maximum mouth opening in healthy individuals. *J. Oral Rehabil.* **2002**, *29*, 534–539.

66. Naeije, M.; Hofman, N. Biomechanics of the human temporomandibular joint during chewing. *J. Dent. Res.* **2003**, *82*, 528–531.
67. Ostry, D.J.; Vatikiotis-Bateson, E.; Gribble, P.L. An examination of the degrees of freedom of human jaw motion in speech and mastication. *J. Speech Lang. Hear. Res.* **1997**, *40*, 1341–1351.
68. Ogawa, T.; Koyano, K.; Umemoto, G. Inclination of the occlusal plane and occlusal guidance as contributing factors in mastication. *J. Dent.* **1998**, *26*, 641–647.
69. Remijn, L.; Groen, B.E.; Speyer, R.; van Limbeek, J.; Vermaire, J.A.; van den Engel-Hoek, L.; Nijhuis-van der Sanden, M.W.G. Can mastication in children with cerebral palsy be analyzed by clinical observation, dynamic ultrasound and 3D kinematics? *J. Electromyogr. Kinesiol.* **2017**, *32*, 22–29.
70. Sforza, C.; Tartaglia, G.M.; Lovecchio, N.; Ugolini, A.; Monteverdi, R.; Gianni, A.B.; Ferrario, V.F. Mandibular movements at maximum mouth opening and EMG activity of masticatory and neck muscles in patients rehabilitated after a mandibular condyle fracture. *J. Cranio-Maxillofacial Surg.* **2009**, *37*, 327–333.
71. Sforza, C.; Ugolini, A.; Rocchetta, D.; Galante, D.; Mapelli, A.; Gianni, A.B. Mandibular kinematics after orthognathic surgical treatment. A pilot study. *Br. J. Oral Maxillofac. Surg.* **2010**, *48*, 110–114.
72. Sforza, C.; Ugolini, A.; Sozzi, D.; Galante, D.; Mapelli, A.; Bozzetti, A. Threedimensional mandibular motion after closed and open reduction of unilateral mandibular condylar process fractures. *J. Cranio-Maxillofacial Surg.* **2011**, *39*, 249–255.
73. Shiller, D.M.; Ostry, D.J.; Gribble, P.L. Effects of gravitational load on jaw movements in speech. *J. Neurosci.* **1999**, *19*, 9073–9080.
74. Shiller, D.M.; Ostry, D.J.; Gribble, P.L.; Laboissière, R. Compensation for the effects of head acceleration on jaw movement in speech. *J. Neurosci.* **2001**, *21*, 6447–6456.
75. Siegler, S.; Hayes, R.; Nicolella, D.; Fielding, A. A technique to investigate the three-dimensional kinesiology of the human temporomandibular joint. *J. Prosthet. Dent.* **1991**, *65*, 833–839.
76. Slater, J.; Visscher, C.M.; Lobbezoo, F.; Naeije, M. The intra-articular distance within the TMJ during free and loaded closing movements. *J. Dent. Res.* **1999**, *78*, 1815–1820.
77. Tomonari, H.; Kwon, S.; Kuninori, T.; Miyawaki, S. Differences between the chewing and non-chewing sides of the mandibular first molars and condyles in the closing phase during chewing in normal subjects. *Arch. Oral Biol.* **2017**, *81*, 198–205.
78. Travers, K.H.; Buschang, P.H.; Hayasaki, H.; Throckmorton, G.S. Associations between incisor and mandibular condylar movements during maximum mouth opening in humans. *Arch. Oral Biol.* **2000**, *45*, 267–275.
79. Ugolini, A.; Mapelli, A.; Segu, M.; Galante, D.; Sidequersky, F.V.; Sforza, C. Kinematic analysis of mandibular motion before and after orthognathic surgery for skeletal Class III malocclusion: a pilot study. *Cranio.* **2017**, *35*, 94–100.
80. Ugolini, A.; Mapelli, A.; Segu, M.; Zago, M.; Codari, M.; Sforza, C. Three dimensional mandibular motion in skeletal Class III patients. *CRANIO-J. Craniomandib. Pract.* **2018**, *36*, 113–120.
81. Visscher, C.M.; Huddleston Slater, J.J.R.; Lobbezoo, F.; Naeije, M. Kinematics of the human mandible for different head postures. *J. Oral Rehabil.* **2000**, *27*, 299–305.
82. Zhao, N.N.; Whittle, T.; Murray, G.M.; Peck, C.C. The effects of capsaicin induced intraoral mucosal pain on jaw movements in humans. *J. Oral Facial Pain Headache.* **2012**, *26*, 277–287.
83. Dos Santos, D.M.; Lucareli, P.R.; Borges Barbosa, B.R.; Alves de Azevedo L.M.; Leonardis, M.N.; Fonseca F.F.; de Carvalho, L.S.; Gonzalez, T.D.O.; Politti F.; Biasotto-Gonzalez, D.A. Reproducibility of a three-dimensional jaw model during opening and lateral excursion tests. *Gait Posture.* **2019**, *73*, 529–530.
84. Dos Santos, D.M.; Politti, F.; de Azevedo, L.M.A.; de Cassia das Neves Martins, R.; Ricci, F.C.; Masuda, K.S.Y.; Muramoto do Nascimento, E.M.; Spinato, I.L.; de Paula Gomes, C.A.F.; Biasotto-Gonzalez, D.A. Association between convergence insufficiency and temporomandibular disorder cross-sectional study. *Clin. Oral Investigations.* **2021**, *25*, 851–858.
85. Ernst, M.; Schenkenberger, A.E.; Domin, M.; Kordass, B.; Lotze, M. Effects of centric mandibular splint therapy on orofacial pain and cerebral activation patterns. *Clin. Oral Investigations.* **2020**, *24*, 2005–2013.
86. Chen, C.-C.; Lin, C.-C.; Hsieh, H.-P.; Fu, Y.-C.; Chen, Y.-J.; Lu, T.-W. In vivo three-dimensional mandibular kinematics and functional point trajectories during temporomandibular activities using 3d fluoroscopy. *Dentomaxillofacial Radiol.* **2021**, *50*, 20190464, doi: 10.1259/dmfr.20190464.
87. Leissner, O.; Maulén-Yáñez, M.; Meeder-Bella, W.; León-Morales, C.; Vergara-Bruna, E.; González-Arriagada, W.A. Assessment of mandibular kinematics values and its relevance for the diagnosis of temporomandibular joint disorders. *J. Dent. Sci.* **2021**, *16*, 241–248.
88. Choi, D.D.; Vandenberg, K.; Smith, D.; Davis, C.; McCain, J.P. Is Temporomandibular Joint Arthroscopy Effective in Managing Pediatric Temporomandibular Joint Disorders in the Short- and Long-Term? *J Oral Maxillofac Surg.* **2020**, *78*, 44–51.
89. Feng, Y.; Shu, J.; Liu, Y.; Zheng, T.; Shao, B.; Liu, Z. Biomechanical analysis of temporomandibular joints during mandibular pro-trusion and retraction motions: A 3d finite element simulation. *Comput. Methods Programs Biomed.* **2021**, *208*, 106299.
90. Shu, J.; Ma, H.; Jia, L.; Fang, H.; Chong, D.Y.R.; Zheng, T.; Yao, J.; Liu, Z. Biomechanical behaviour of temporomandibular joints during opening and closing of the mouth: A 3D finite element analysis. *Int J Numer. Method Biomed Eng.* **2020**, *8*, e3373.
91. Shu, J.; Ma, H.; Xiong, X.; Shao, B.; Zheng, T.; Liu, Y.; Liu, Z. Mathematical analysis of the condylar trajectories in asymptomatic subjects during mandibular motions. *Med Biol Eng Comput.* **2021**, *59*, 901–911.
